# Supplementary material for: Synthesis, structure and theoretical study of mixed fluoro-trifluoromethyl derivatives of C60. Molecular structures of C60F18(CF3)6 and C60F16(CF3)6
Source: Royal Society of Chemistry journal article supplement (doi:10.1039/b801214h), 2008-01-01
Supplement: b801214h.pdf [file b801214h.pdf]

**Synthesis, structure and theoretical study of mixed fluoro-  
trifluoromethyl derivatives of C<sub>60</sub>.  
Molecular structures of C<sub>60</sub>F<sub>18</sub>(CF<sub>3</sub>)<sub>6</sub> and C<sub>60</sub>F<sub>16</sub>(CF<sub>3</sub>)<sub>6</sub>**

*S. I. Troyanov, A. A. Goryunkov, N. B. Tamm, V. Yu. Markov, I. N. Ioffe, L. N. Sidorov*

**Table of contents**

- *Figure S1.* PSD mass spectra for (a) C<sub>60</sub>F<sub>18</sub>(CF<sub>3</sub>)<sub>6</sub><sup>-</sup>, (b) C<sub>60</sub>F<sub>17</sub>(CF<sub>3</sub>)<sub>6</sub><sup>-</sup> and (c) C<sub>60</sub>F<sub>17</sub>CF<sub>3</sub><sup>-</sup> ions from MALDI mass spectra. S2
- *Table S1.* Schlegel diagrams, relative energies (at the DFT and AM1 levels of theory), and IUPAC lowest-locant abbreviation for the isomers of C<sub>60</sub>F<sub>18</sub>(CF<sub>3</sub>)<sub>6</sub> within DFT energy gap of 70 kJ·mol<sup>-1</sup> (the field with the experimentally observed isomer is shadowed). S3
- *Table S2.* Schlegel diagrams, relative energies (at the DFT and AM1 levels of theory), and IUPAC lowest-locant abbreviation for the isomers of C<sub>60</sub>F<sub>16</sub>(CF<sub>3</sub>)<sub>6</sub> within 40 kJ·mol<sup>-1</sup> DFT energy gap. (the field with the experimentally observed isomer is shadowed). S8
- *Figure S2.* DFT-optimized structures with some non-bonding F...F distances, corresponding Schlegel diagrams and DFT energies for three possible isomers of C<sub>60</sub>F<sub>18</sub>(CF<sub>3</sub>)<sub>6</sub> with skew pentagonal pyramid addition pattern of attached CF<sub>3</sub> groups. S15

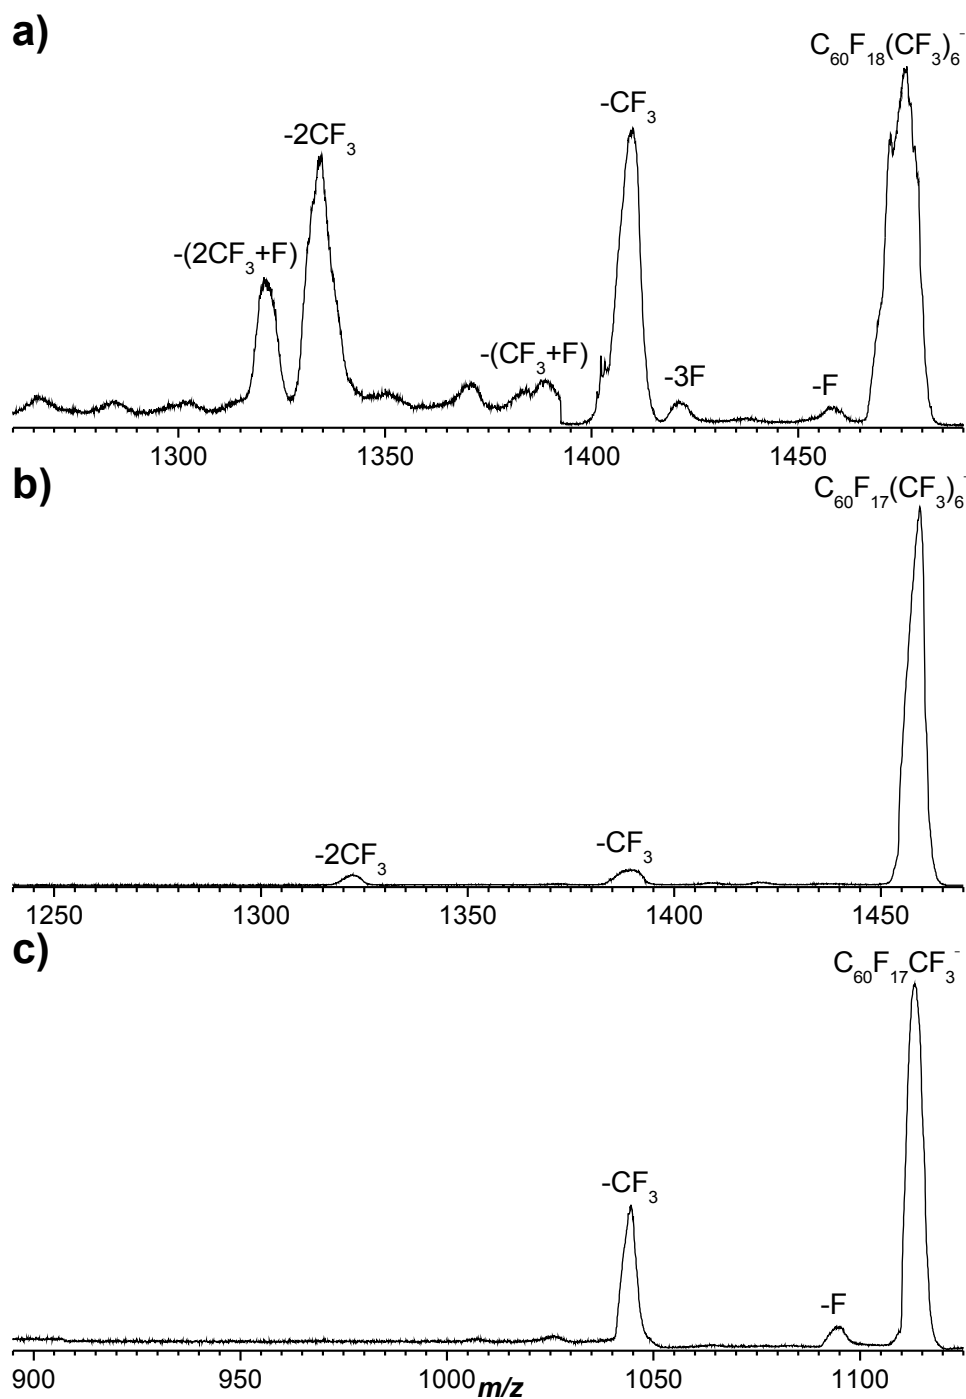

**Figure S1.** PSD mass spectra for (a)  $C_{60}F_{18}(CF_3)_6^-$ , (b)  $C_{60}F_{17}(CF_3)_6^-$  and (c)  $C_{60}F_{17}CF_3^-$  ions from MALDI mass spectra, 2-[(2E)-3-(4-*tert*-butylphenyl)-2-methylprop-2-enylidene]malononitrile (DCTB,  $\geq 99\%$ , Fluka) matrix, Bruker AutoFlex II time-of-flight reflectron device ( $N_2$  laser, 337 nm, 1 ns pulse).

**Table S1.** Schlegel diagrams, relative energies (at the DFT and AM1 levels of theory), and IUPAC lowest-locant abbreviation for the isomers of  $C_{60}F_{18}(CF_3)_6$  within DFT energy gap of  $70 \text{ kJ mol}^{-1}$ . Black circles denote attached fluorine atoms, black triangles denote positions of  $CF_3$  groups. Field with the experimental isomer is marked gray.

| <i>No.</i> | <i>Schlegel Diagrams of</i><br>$C_{60}F_{18}(CF_3)_6$                               | $\Delta \Delta_f H_0^\circ, \text{kJ mol}^{-1}$ |            | <i>IUPAC lowest-locant abbreviation for</i><br>$C_{60}F_{18}(CF_3)_6$                                                                                                               |
|------------|-------------------------------------------------------------------------------------|-------------------------------------------------|------------|-------------------------------------------------------------------------------------------------------------------------------------------------------------------------------------|
|            |                                                                                     | <i>DFT</i>                                      | <i>AM1</i> |                                                                                                                                                                                     |
| 1          | 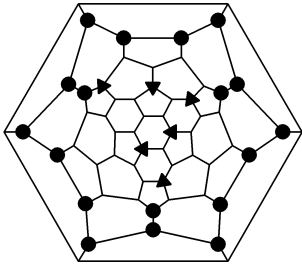   | 0.0                                             | 2.6        | 11, 27, 44, 49, 52, 58- <i>hexakis</i> (trifluoromethyl)-1, 2, 3, 7, 8, 9, 12, 15, 16, 17, 21, 22, 23, 36, 37, 38, 39, 40-octadecafluoro-( $C_{60}$ -I <sub>h</sub> )[5,6]fullerene |
| 2          |   | 11.4                                            | 34.8       | 11, 27, 32, 35, 44, 58- <i>hexakis</i> (trifluoromethyl)-1, 2, 3, 7, 8, 9, 12, 15, 16, 17, 21, 22, 23, 36, 37, 38, 39, 40-octadecafluoro-( $C_{60}$ -I <sub>h</sub> )[5,6]fullerene |
| 3          |  | 14.9                                            | 31.9       | 2, 3, 14, 17, 32, 35- <i>hexakis</i> (trifluoromethyl)-1, 7, 8, 9, 10, 11, 22, 23, 28, 29, 41, 42, 43, 46, 47, 48, 57, 58-octadecafluoro-( $C_{60}$ -I <sub>h</sub> )[5,6]fullerene |
| 4          |  | 29.3                                            | 26.1       | 11, 27, 44, 50, 58, 60- <i>hexakis</i> (trifluoromethyl)-1, 2, 3, 7, 8, 9, 12, 15, 16, 17, 21, 22, 23, 36, 37, 38, 39, 40-octadecafluoro-( $C_{60}$ -I <sub>h</sub> )[5,6]fullerene |

| $N_2.N_2$ | Schlegel Diagrams of<br>$C_{60}F_{18}(CF_3)_6$                                      | $\Delta\Delta_f H_0^o, kJ mol^{-1}$ |      | IUPAC lowest-locant abbreviation for<br>$C_{60}F_{18}(CF_3)_6$                                                                                                                   |
|-----------|-------------------------------------------------------------------------------------|-------------------------------------|------|----------------------------------------------------------------------------------------------------------------------------------------------------------------------------------|
|           |                                                                                     | DFT                                 | AMI  |                                                                                                                                                                                  |
| 5         | 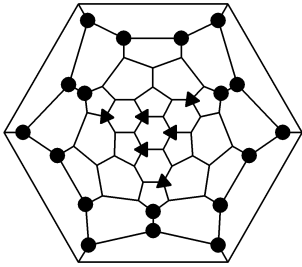   | 29.6                                | 0.0  | 29, 43, 46, 48, 51, 59-hexakis(trifluoromethyl)-1, 2, 3, 7, 8, 9, 12, 15, 16, 17, 21, 22, 23, 36, 37, 38, 39, 40-octadecafluoro-(C <sub>60</sub> -I <sub>h</sub> )[5,6]fullerene |
| 6         |    | 31.1                                | 25.1 | 26, 29, 44, 46, 48, 58-hexakis(trifluoromethyl)-1, 2, 3, 7, 8, 9, 12, 15, 16, 17, 21, 22, 23, 36, 37, 38, 39, 40-octadecafluoro-(C <sub>60</sub> -I <sub>h</sub> )[5,6]fullerene |
| 7         |   | 35.3                                | 49.8 | 26, 29, 44, 46, 48, 49-hexakis(trifluoromethyl)-1, 2, 3, 7, 8, 9, 12, 15, 16, 17, 21, 22, 23, 36, 37, 38, 39, 40-octadecafluoro-(C <sub>60</sub> -I <sub>h</sub> )[5,6]fullerene |
| 8         |  | 39.1                                | 29.8 | 26, 29, 44, 48, 51, 59-hexakis(trifluoromethyl)-1, 2, 3, 7, 8, 9, 12, 15, 16, 17, 21, 22, 23, 36, 37, 38, 39, 40-octadecafluoro-(C <sub>60</sub> -I <sub>h</sub> )[5,6]fullerene |
| 9         |  | 39.1                                | 52.5 | 10, 28, 32, 35, 48, 58-hexakis(trifluoromethyl)-1, 2, 3, 7, 8, 9, 12, 15, 16, 17, 21, 22, 23, 36, 37, 38, 39, 40-octadecafluoro-(C <sub>60</sub> -I <sub>h</sub> )[5,6]fullerene |

| $N_2.N_2$ | Schlegel Diagrams of<br>$C_{60}F_{18}(CF_3)_6$                                      | $\Delta\Delta_f H_0^o, kJ mol^{-1}$ |      | IUPAC lowest-locant abbreviation for<br>$C_{60}F_{18}(CF_3)_6$                                                                                                                   |
|-----------|-------------------------------------------------------------------------------------|-------------------------------------|------|----------------------------------------------------------------------------------------------------------------------------------------------------------------------------------|
|           |                                                                                     | DFT                                 | AMI  |                                                                                                                                                                                  |
| 10        | 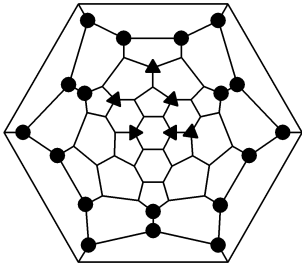   | 41.7                                | 34.5 | 26, 28, 31, 44, 48, 58-hexakis(trifluoromethyl)-1, 2, 3, 7, 8, 9, 12, 15, 16, 17, 21, 22, 23, 36, 37, 38, 39, 40-octadecafluoro-(C <sub>60</sub> -I <sub>h</sub> )[5,6]fullerene |
| 11        |    | 43.2                                | 18.1 | 28, 31, 43, 46, 51, 59-hexakis(trifluoromethyl)-1, 2, 3, 7, 8, 9, 12, 15, 16, 17, 21, 22, 23, 36, 37, 38, 39, 40-octadecafluoro-(C <sub>60</sub> -I <sub>h</sub> )[5,6]fullerene |
| 12        |   | 46.5                                | 35.1 | 26, 28, 29, 44, 48, 58-hexakis(trifluoromethyl)-1, 2, 3, 7, 8, 9, 12, 15, 16, 17, 21, 22, 23, 36, 37, 38, 39, 40-octadecafluoro-(C <sub>60</sub> -I <sub>h</sub> )[5,6]fullerene |
| 13        |  | 47.3                                | 46.8 | 26, 29, 47, 48, 51, 59-hexakis(trifluoromethyl)-1, 2, 3, 7, 8, 9, 12, 15, 16, 17, 21, 22, 23, 36, 37, 38, 39, 40-octadecafluoro-(C <sub>60</sub> -I <sub>h</sub> )[5,6]fullerene |
| 14        |  | 48.8                                | 49.7 | 10, 28, 43, 48, 55, 58-hexakis(trifluoromethyl)-1, 2, 3, 7, 8, 9, 12, 15, 16, 17, 21, 22, 23, 36, 37, 38, 39, 40-octadecafluoro-(C <sub>60</sub> -I <sub>h</sub> )[5,6]fullerene |

| $N_2.N_2$ | Schlegel Diagrams of<br>$C_{60}F_{18}(CF_3)_6$                                      | $\Delta\Delta_f H_0^o, kJ mol^{-1}$ |      | IUPAC lowest-locant abbreviation for<br>$C_{60}F_{18}(CF_3)_6$                                                                                                                   |
|-----------|-------------------------------------------------------------------------------------|-------------------------------------|------|----------------------------------------------------------------------------------------------------------------------------------------------------------------------------------|
|           |                                                                                     | DFT                                 | AMI  |                                                                                                                                                                                  |
| 15        | 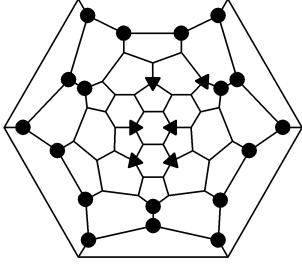   | 48.8                                | 47.1 | 11, 27, 48, 50, 58, 60-hexakis(trifluoromethyl)-1, 2, 3, 7, 8, 9, 12, 15, 16, 17, 21, 22, 23, 36, 37, 38, 39, 40-octadecafluoro-(C <sub>60</sub> -I <sub>h</sub> )[5,6]fullerene |
| 16        |    | 52.2                                | 45.8 | 26, 28, 31, 44, 46, 49-hexakis(trifluoromethyl)-1, 2, 3, 7, 8, 9, 12, 15, 16, 17, 21, 22, 23, 36, 37, 38, 39, 40-octadecafluoro-(C <sub>60</sub> -I <sub>h</sub> )[5,6]fullerene |
| 17        |   | 56.9                                | 52.5 | 11, 27, 43, 46, 51, 59-hexakis(trifluoromethyl)-1, 2, 3, 7, 8, 9, 12, 15, 16, 17, 21, 22, 23, 36, 37, 38, 39, 40-octadecafluoro-(C <sub>60</sub> -I <sub>h</sub> )[5,6]fullerene |
| 18        |  | 65.1                                | 47.0 | 26, 29, 48, 50, 58, 60-hexakis(trifluoromethyl)-1, 2, 3, 7, 8, 9, 12, 15, 16, 17, 21, 22, 23, 36, 37, 38, 39, 40-octadecafluoro-(C <sub>60</sub> -I <sub>h</sub> )[5,6]fullerene |
| 19        |  | 66.0                                | 24.0 | 28, 31, 43, 46, 49, 52-hexakis(trifluoromethyl)-1, 2, 3, 7, 8, 9, 12, 15, 16, 17, 21, 22, 23, 36, 37, 38, 39, 40-octadecafluoro-(C <sub>60</sub> -I <sub>h</sub> )[5,6]fullerene |

| $N_2.N_2$ | <i>Schlegel Diagrams of</i><br>$C_{60}F_{18}(CF_3)_6$ | $\Delta\Delta_f H_0^o, kJ mol^{-1}$ |            | <i>IUPAC lowest-locant abbreviation for</i><br>$C_{60}F_{18}(CF_3)_6$                                                                                                                     |
|-----------|-------------------------------------------------------|-------------------------------------|------------|-------------------------------------------------------------------------------------------------------------------------------------------------------------------------------------------|
|           |                                                       | <i>DFT</i>                          | <i>AMI</i> |                                                                                                                                                                                           |
| 20        |                                                       | 67.7                                | 48.7       | 26, 27, 29, 44, 48, 58- <i>hexakis</i> (trifluoromethyl)-1, 2, 3, 7, 8, 9, 12, 15, 16, 17, 21, 22, 23, 36, 37, 38, 39, 40-octadecafluoro-(C <sub>60</sub> -I <sub>h</sub> )[5,6]fullerene |
| 21        |                                                       | 69.4                                | 47.4       | 11, 27, 43, 46, 49, 52- <i>hexakis</i> (trifluoromethyl)-1, 2, 3, 7, 8, 9, 12, 15, 16, 17, 21, 22, 23, 36, 37, 38, 39, 40-octadecafluoro-(C <sub>60</sub> -I <sub>h</sub> )[5,6]fullerene |

**Table S2.** Schlegel diagrams, relative energies (at the DFT and AM1 levels of theory), and IUPAC lowest-locant abbreviation for the isomers of  $C_{60}F_{16}(CF_3)_6$  within 40  $\text{kJ}\cdot\text{mol}^{-1}$  DFT energy gap. Black circles denote attached fluorine atoms, black triangles denote positions of  $CF_3$  groups. Field with the experimental isomer is marked gray.

| <i>No.</i> | <i>Schlegel Diagrams of</i><br>$C_{60}F_{16}(CF_3)_6$ | $\Delta \Delta_f H_0^\circ, \text{kJ mol}^{-1}$ |            | <i>IUPAC lowest-locant abbreviation for</i><br>$C_{60}F_{16}(CF_3)_6$                                                                                                       |
|------------|-------------------------------------------------------|-------------------------------------------------|------------|-----------------------------------------------------------------------------------------------------------------------------------------------------------------------------|
|            |                                                       | <i>DFT</i>                                      | <i>AM1</i> |                                                                                                                                                                             |
| 1          |                                                       | 0.0                                             | 0.0        | 23, 30, 32, 47, 51, 59- <i>hexakis</i> (trifluoromethyl)-1, 2, 3, 7, 8, 9, 12, 15, 16, 17, 21, 22, 37, 38, 39, 40-hexadecafluoro-( $C_{60}$ -I <sub>h</sub> )[5,6]fullerene |
| 2          |                                                       | 0.5                                             | 35.8       | 10, 13, 23, 32, 51, 59- <i>hexakis</i> (trifluoromethyl)-1, 2, 3, 7, 8, 9, 15, 16, 17, 21, 22, 36, 37, 38, 39, 40-hexadecafluoro-( $C_{60}$ -I <sub>h</sub> )[5,6]fullerene |
| 3          |                                                       | 2.3                                             | 39.3       | 11, 23, 27, 36, 48, 58- <i>hexakis</i> (trifluoromethyl)-1, 2, 3, 7, 8, 9, 12, 15, 16, 17, 21, 22, 37, 38, 39, 40-hexadecafluoro-( $C_{60}$ -I <sub>h</sub> )[5,6]fullerene |
| 4          |                                                       | 8.2                                             | 27.1       | 10, 23, 28, 36, 48, 58- <i>hexakis</i> (trifluoromethyl)-1, 2, 3, 7, 8, 9, 12, 15, 16, 17, 21, 22, 37, 38, 39, 40-hexadecafluoro-( $C_{60}$ -I <sub>h</sub> )[5,6]fullerene |



| $N_2.N_2$ | Schlegel Diagrams of $C_{60}F_{16}(CF_3)_6$                                         | $\Delta\Delta_f H_0^o, kJ mol^{-1}$ |      | IUPAC lowest-locant abbreviation for $C_{60}F_{16}(CF_3)_6$                                                                                                              |
|-----------|-------------------------------------------------------------------------------------|-------------------------------------|------|--------------------------------------------------------------------------------------------------------------------------------------------------------------------------|
|           |                                                                                     | DFT                                 | AMI  |                                                                                                                                                                          |
| 5         | 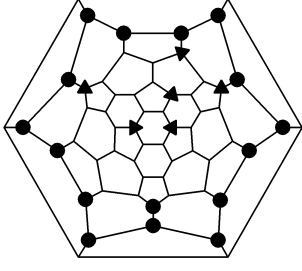   | 12.0                                | 30.3 | 10, 12, 23, 28, 48, 58-hexakis(trifluoromethyl)-1, 2, 3, 7, 8, 9, 15, 16, 17, 21, 22, 36, 37, 38, 39, 40-hexadecafluoro-(C <sub>60</sub> -I <sub>h</sub> )[5,6]fullerene |
| 6         |    | 12.3                                | 27.3 | 23, 29, 36, 46, 48, 58-hexakis(trifluoromethyl)-1, 2, 3, 7, 8, 9, 12, 15, 16, 17, 21, 22, 37, 38, 39, 40-hexadecafluoro-(C <sub>60</sub> -I <sub>h</sub> )[5,6]fullerene |
| 7         |   | 13.6                                | 30.3 | 10, 12, 28, 36, 48, 58-hexakis(trifluoromethyl)-1, 2, 3, 7, 8, 9, 15, 16, 17, 21, 22, 23, 37, 38, 39, 40-hexadecafluoro-(C <sub>60</sub> -I <sub>h</sub> )[5,6]fullerene |
| 8         |  | 14.8                                | 31.4 | 10, 43, 46, 49, 52, 56-hexakis(trifluoromethyl)-1, 2, 3, 7, 8, 9, 15, 16, 17, 21, 22, 23, 37, 38, 39, 40-hexadecafluoro-(C <sub>60</sub> -I <sub>h</sub> )[5,6]fullerene |
| 9         |  | 18.3                                | 31.1 | 11, 27, 32, 36, 44, 58-hexakis(trifluoromethyl)-1, 2, 3, 7, 8, 9, 15, 16, 17, 21, 22, 23, 37, 38, 39, 40-hexadecafluoro-(C <sub>60</sub> -I <sub>h</sub> )[5,6]fullerene |

| $N_2.N_2$ | Schlegel Diagrams of $C_{60}F_{16}(CF_3)_6$                                         | $\Delta\Delta_f H_0^o, kJ mol^{-1}$ |      | IUPAC lowest-locant abbreviation for $C_{60}F_{16}(CF_3)_6$                                                                                                              |
|-----------|-------------------------------------------------------------------------------------|-------------------------------------|------|--------------------------------------------------------------------------------------------------------------------------------------------------------------------------|
|           |                                                                                     | DFT                                 | AMI  |                                                                                                                                                                          |
| 10        | 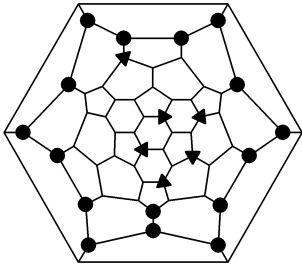   | 19.0                                | 32.2 | 10, 43, 46, 49, 52, 56-hexakis(trifluoromethyl)-1, 2, 3, 7, 8, 9, 15, 16, 17, 21, 22, 36, 37, 38, 39, 40-hexadecafluoro-(C <sub>60</sub> -I <sub>h</sub> )[5,6]fullerene |
| 11        |    | 20.0                                | 26.9 | 10, 29, 36, 43, 46, 48-hexakis(trifluoromethyl)-1, 2, 3, 7, 8, 9, 15, 16, 17, 21, 22, 23, 37, 38, 39, 40-hexadecafluoro-(C <sub>60</sub> -I <sub>h</sub> )[5,6]fullerene |
| 12        |   | 20.2                                | 32.9 | 11, 23, 27, 32, 51, 59-hexakis(trifluoromethyl)-1, 2, 3, 7, 8, 9, 15, 16, 17, 21, 22, 36, 37, 38, 39, 40-hexadecafluoro-(C <sub>60</sub> -I <sub>h</sub> )[5,6]fullerene |
| 13        |  | 21.6                                | 28.8 | 23, 26, 29, 36, 48, 58-hexakis(trifluoromethyl)-1, 2, 3, 7, 8, 9, 12, 15, 16, 17, 21, 22, 37, 38, 39, 40-hexadecafluoro-(C <sub>60</sub> -I <sub>h</sub> )[5,6]fullerene |
| 14        |  | 24.0                                | 34.5 | 23, 28, 31, 36, 46, 49-hexakis(trifluoromethyl)-1, 2, 3, 7, 8, 9, 12, 15, 16, 17, 21, 22, 37, 38, 39, 40-hexadecafluoro-(C <sub>60</sub> -I <sub>h</sub> )[5,6]fullerene |

| $N_2.N_2$ | Schlegel Diagrams of<br>$C_{60}F_{16}(CF_3)_6$                                      | $\Delta\Delta_f H_0^o, kJ mol^{-1}$ |      | IUPAC lowest-locant abbreviation for<br>$C_{60}F_{16}(CF_3)_6$                                                                                                           |
|-----------|-------------------------------------------------------------------------------------|-------------------------------------|------|--------------------------------------------------------------------------------------------------------------------------------------------------------------------------|
|           |                                                                                     | DFT                                 | AMI  |                                                                                                                                                                          |
| 15        | 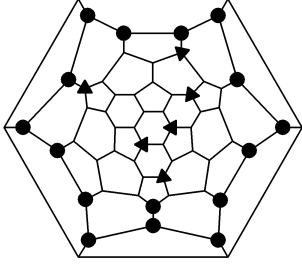   | 24.2                                | 28.8 | 10, 23, 29, 48, 51, 59-hexakis(trifluoromethyl)-1, 2, 3, 7, 8, 9, 15, 16, 17, 21, 22, 36, 37, 38, 39, 40-hexadecafluoro-(C <sub>60</sub> -I <sub>h</sub> )[5,6]fullerene |
| 16        |    | 24.6                                | 35.0 | 23, 28, 29, 36, 48, 58-hexakis(trifluoromethyl)-1, 2, 3, 7, 8, 9, 12, 15, 16, 17, 21, 22, 37, 38, 39, 40-hexadecafluoro-(C <sub>60</sub> -I <sub>h</sub> )[5,6]fullerene |
| 17        |   | 25.0                                | 34.0 | 10, 23, 28, 29, 48, 58-hexakis(trifluoromethyl)-1, 2, 3, 7, 8, 9, 15, 16, 17, 21, 22, 36, 37, 38, 39, 40-hexadecafluoro-(C <sub>60</sub> -I <sub>h</sub> )[5,6]fullerene |
| 18        |  | 25.5                                | 33.5 | 12, 28, 31, 36, 44, 58-hexakis(trifluoromethyl)-1, 2, 3, 7, 8, 9, 15, 16, 17, 21, 22, 23, 37, 38, 39, 40-hexadecafluoro-(C <sub>60</sub> -I <sub>h</sub> )[5,6]fullerene |
| 19        |  | 25.9                                | 34.0 | 10, 28, 29, 36, 48, 58-hexakis(trifluoromethyl)-1, 2, 3, 7, 8, 9, 15, 16, 17, 21, 22, 23, 37, 38, 39, 40-hexadecafluoro-(C <sub>60</sub> -I <sub>h</sub> )[5,6]fullerene |

| $N_2.N_2$ | Schlegel Diagrams of<br>$C_{60}F_{16}(CF_3)_6$                                      | $\Delta\Delta_f H_0^o, kJ mol^{-1}$ |      | IUPAC lowest-locant abbreviation for<br>$C_{60}F_{16}(CF_3)_6$                                                                                                           |
|-----------|-------------------------------------------------------------------------------------|-------------------------------------|------|--------------------------------------------------------------------------------------------------------------------------------------------------------------------------|
|           |                                                                                     | DFT                                 | AMI  |                                                                                                                                                                          |
| 20        | 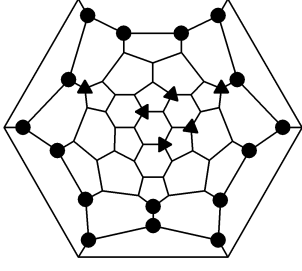   | 26.2                                | 34.1 | 12, 28, 31, 36, 46, 49-hexakis(trifluoromethyl)-1, 2, 3, 7, 8, 9, 15, 16, 17, 21, 22, 23, 37, 38, 39, 40-hexadecafluoro-(C <sub>60</sub> -I <sub>h</sub> )[5,6]fullerene |
| 21        |    | 27.5                                | 39.9 | 23, 28, 31, 36, 47, 59-hexakis(trifluoromethyl)-1, 2, 3, 7, 8, 9, 12, 15, 16, 17, 21, 22, 37, 38, 39, 40-hexadecafluoro-(C <sub>60</sub> -I <sub>h</sub> )[5,6]fullerene |
| 22        |   | 28.4                                | 39.5 | 12, 28, 31, 36, 47, 59-hexakis(trifluoromethyl)-1, 2, 3, 7, 8, 9, 15, 16, 17, 21, 22, 23, 37, 38, 39, 40-hexadecafluoro-(C <sub>60</sub> -I <sub>h</sub> )[5,6]fullerene |
| 23        |  | 28.9                                | 37.6 | 10, 29, 36, 46, 48, 58-hexakis(trifluoromethyl)-1, 2, 3, 7, 8, 9, 15, 16, 17, 21, 22, 23, 37, 38, 39, 40-hexadecafluoro-(C <sub>60</sub> -I <sub>h</sub> )[5,6]fullerene |
| 24        |  | 28.9                                | 39.5 | 12, 23, 28, 31, 47, 59-hexakis(trifluoromethyl)-1, 2, 3, 7, 8, 9, 15, 16, 17, 21, 22, 36, 37, 38, 39, 40-hexadecafluoro-(C <sub>60</sub> -I <sub>h</sub> )[5,6]fullerene |

| $N_2.N_2$ | Schlegel Diagrams of<br>$C_{60}F_{16}(CF_3)_6$                                      | $\Delta\Delta_f H_0^o, kJ mol^{-1}$ |      | IUPAC lowest-locant abbreviation for<br>$C_{60}F_{16}(CF_3)_6$                                                                                                           |
|-----------|-------------------------------------------------------------------------------------|-------------------------------------|------|--------------------------------------------------------------------------------------------------------------------------------------------------------------------------|
|           |                                                                                     | DFT                                 | AMI  |                                                                                                                                                                          |
| 25        | 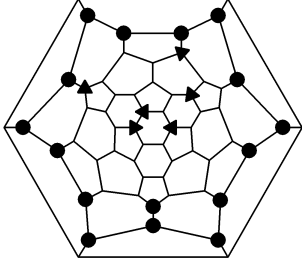   | 29.3                                | 38.0 | 10, 23, 29, 46, 48, 58-hexakis(trifluoromethyl)-1, 2, 3, 7, 8, 9, 15, 16, 17, 21, 22, 36, 37, 38, 39, 40-hexadecafluoro-(C <sub>60</sub> -I <sub>h</sub> )[5,6]fullerene |
| 26        |    | 36.2                                | 26.9 | 23, 30, 47, 49, 52, 56-hexakis(trifluoromethyl)-1, 2, 3, 7, 8, 9, 12, 15, 16, 17, 21, 22, 37, 38, 39, 40-hexadecafluoro-(C <sub>60</sub> -I <sub>h</sub> )[5,6]fullerene |
| 27        |   | 36.5                                | 37.1 | 23, 29, 36, 43, 46, 48-hexakis(trifluoromethyl)-1, 2, 3, 7, 8, 9, 12, 15, 16, 17, 21, 22, 37, 38, 39, 40-hexadecafluoro-(C <sub>60</sub> -I <sub>h</sub> )[5,6]fullerene |
| 28        |  | 36.6                                | 36.4 | 12, 29, 36, 43, 46, 48-hexakis(trifluoromethyl)-1, 2, 3, 7, 8, 9, 15, 16, 17, 21, 22, 23, 37, 38, 39, 40-hexadecafluoro-(C <sub>60</sub> -I <sub>h</sub> )[5,6]fullerene |
| 29        |  | 37.6                                | 19.1 | 12, 30, 32, 47, 51, 59-hexakis(trifluoromethyl)-1, 2, 3, 7, 8, 9, 15, 16, 17, 21, 22, 23, 37, 38, 39, 40-hexadecafluoro-(C <sub>60</sub> -I <sub>h</sub> )[5,6]fullerene |

| $N_2.N_2$ | <i>Schlegel Diagrams of</i><br>$C_{60}F_{16}(CF_3)_6$                             | $\Delta\Delta_f H_0^o, kJ mol^{-1}$ |            | <i>IUPAC lowest-locant abbreviation for</i><br>$C_{60}F_{16}(CF_3)_6$                                                                                                              |
|-----------|-----------------------------------------------------------------------------------|-------------------------------------|------------|------------------------------------------------------------------------------------------------------------------------------------------------------------------------------------|
|           |                                                                                   | <i>DFT</i>                          | <i>AM1</i> |                                                                                                                                                                                    |
| 30        | 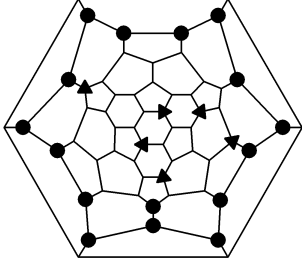 | 39.4                                | 28.2       | 10, 29, 36, 44, 48, 58- <i>hexakis</i> (trifluoromethyl)-<br>1, 2, 3, 7, 8, 9, 15, 16, 17, 21, 22, 23, 37, 38, 39,<br>40-hexadecafluoro-( $C_{60}$ -I <sub>h</sub> )[5,6]fullerene |

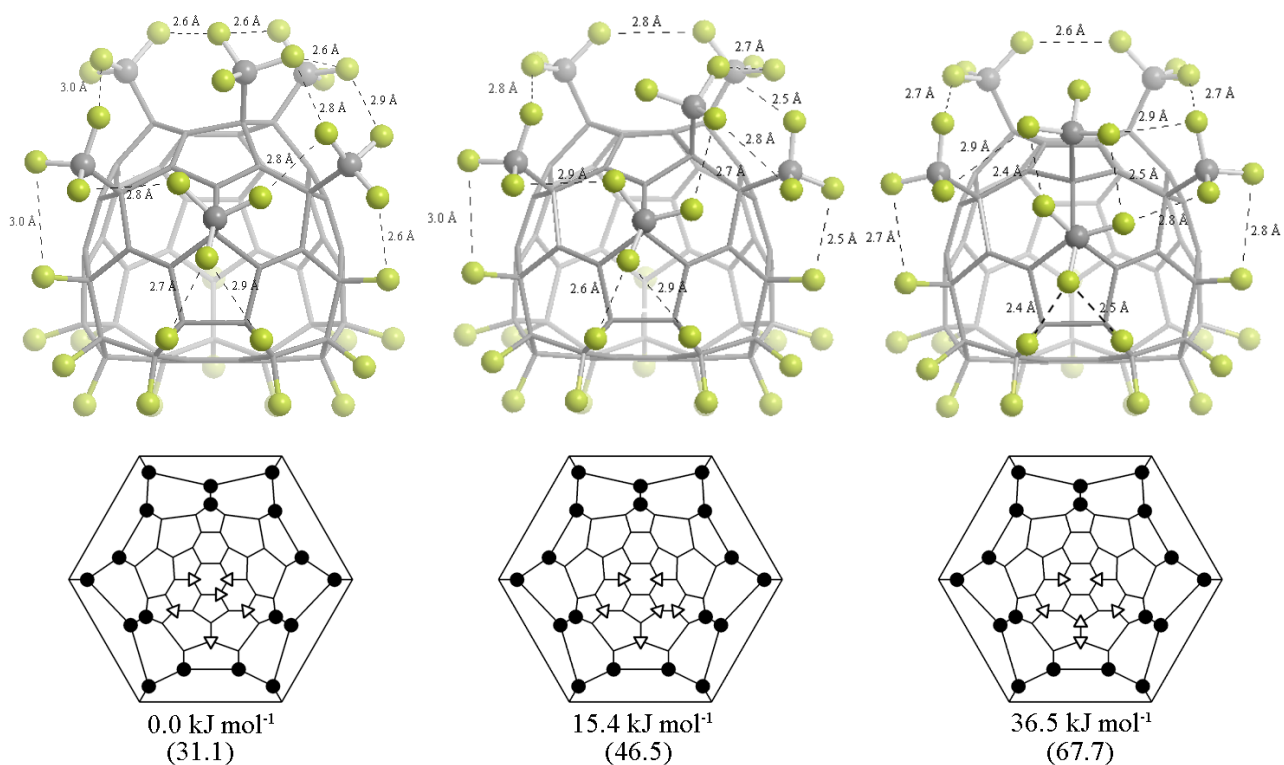

**Figure S2.** DFT-optimized structures with some non-bonding  $F \cdots F$  distances ( $\text{\AA}$ ), corresponding Schlegel diagrams and DFT energies ( $\text{kJ}\cdot\text{mol}^{-1}$ ) for three possible isomers of  $C_{60}F_{18}(CF_3)_6$  with skew pentagonal pyramid addition pattern of attached  $CF_3$  groups. The DFT energies are given relative to the most stable of three isomers; the DFT energies relative to the most stable isomer  $C_{60}F_{18}(CF_3)_6$  (see *Table S1*) are given in the parentheses.
